# Supplementary material
Source: HighWire-hosted journal article supplement (https://rc.rcjournal.com/highwire/filestream/11886/field_highwire_adjunct_files/0/RC-01697.R5_Paneroni_Suppl.pdf)
Supplement: RC-01697.R5_Paneroni_Suppl.pdf [file RC-01697.R5_Paneroni_Suppl.pdf]

**APPENDIX 1: LEARNING QUESTIONNAIRE**

***a. COPD domain:***

|                                                                                              |
|----------------------------------------------------------------------------------------------|
| 1. CHRONIC OBSTRUCTIVE PULMONARY DISEASE, CALLED COPD, IS A DISEASE THAT INVOLVES:           |
|                                                                                              |
| a) Only the airways                                                                          |
| b) Both lungs and airways                                                                    |
| c) Both lungs and kidneys                                                                    |
|                                                                                              |
| 2. THE MAIN CAUSE OF COPD IS:                                                                |
|                                                                                              |
| a) Air pollution                                                                             |
| b) Cigarette Smoking                                                                         |
| c) Inactive lifestyle                                                                        |
|                                                                                              |
| 3. THE MAIN SYMPTOMS/DISORDERS OF COPD ARE:                                                  |
|                                                                                              |
| a) Frequent infections, breathlessness, heart palpitations                                   |
| b) Increase in hunger, body weight and sleep                                                 |
| c) Shortness of breath during activity, cough, phlegm encumbrance , frequent lung infections |
|                                                                                              |
| 4. THE EXACERBATION OF COPD IS:                                                              |
|                                                                                              |
| a) Temporary aggravation of the disease                                                      |
| b) The final worsening of the disease                                                        |
| c) An onset of fever                                                                         |
|                                                                                              |
| 5. WHAT SHOULD I DO IN CASE EXACERBATION OF COPD?                                            |
|                                                                                              |
| a) Do not need to cure it                                                                    |
| b) Temporarily suspend medications                                                           |
| c) Immediately notify the physician and increase dosage of drug therapy                      |
|                                                                                              |
| 6. THE EXACERBATION OF COPD CAN:                                                             |
|                                                                                              |
| a) Be treated and resolved                                                                   |
| b) Be treated only in the hospital                                                           |

|                                            |
|--------------------------------------------|
| c) Be neglected because it resolves itself |
|--------------------------------------------|

**b. Rehabilitation domain:**

|                                                                                 |
|---------------------------------------------------------------------------------|
| 7. RESPIRATORY REHABILITATION IN COPD IS AN APPROPRIATE INTERVENTION:           |
|                                                                                 |
| a) Always in symptomatic patients                                               |
| b) Only during the exacerbation                                                 |
| c) Only if the patient is obese                                                 |
|                                                                                 |
| 8. PHYSIOTHERAPY IS MAINLY COMPOSED OF:                                         |
|                                                                                 |
| a) Physical exercise, breathing exercises to clear the phlegm, health education |
| b) Only exercise                                                                |
| c) Massage and deep breathing                                                   |
|                                                                                 |
| 9. WHAT YOU MUST MONITOR WHEN YOU ARE DOING YOUR EXERCISE ON YOUR OWN?          |
|                                                                                 |
| a) Heart rate, shortness of breath and fatigue of leg muscles                   |
| b) Only the heart rate                                                          |
| c) The onset of chest pain                                                      |

**c. Lifestyles domain:**

|                                                                                                          |
|----------------------------------------------------------------------------------------------------------|
| 10. Does EXCESSIVE BODY WEIGHT LIMIT ACTIVITIES OF DAILY LIFE IN COPD?                                   |
|                                                                                                          |
| a) Body weight is not a problem: it's the disease that causes me problems                                |
| b) Excessive body weight is an additional health hazard                                                  |
| c) Increase in body weight is always a temporary problem. A few days in exercises will solve my problems |
|                                                                                                          |
| 11. THE THINNESS AND EXCESSIVE WEIGHT LOSS IN COPD ARE:                                                  |
|                                                                                                          |
| a) A serious health risk                                                                                 |
| b) A favourable condition for the prognosis                                                              |
| c) An element that does not influence the course                                                         |
|                                                                                                          |
| 12. FOR CORRECT WAY OF LIFE IN COPD:                                                                     |
|                                                                                                          |
| a) Do not smoke and walk every day                                                                       |

ONLINE DATA SUPPLEMENT

|                                                                       |
|-----------------------------------------------------------------------|
| b) Walk every day                                                     |
| c) Do not smoke                                                       |
|                                                                       |
| 13. SMOKING CESSATION IN COPD PRODUCES                                |
|                                                                       |
| a) Improvement in the medium to long term health status               |
| b) An improvement only if I smoked over 20 cigarettes a day           |
| c) No improvement                                                     |
|                                                                       |
| 14. IF YOU FEEL BREATHLESS DURING MEALS IT IS HELPFUL IF:             |
|                                                                       |
| a) You Eat in bed                                                     |
| b) Make more snacks during the day and eat slowly                     |
| c) Drink plenty of fluids with meals                                  |
|                                                                       |
| 15. WHEN YOU MUST TRAVEL YOU HAVE TO:                                 |
|                                                                       |
| a) Prepare an adequate supply of drugs and arrange a supply of oxygen |
| b) Go only to beach resort                                            |
| c) You should stay at home and not Travel                             |

**d. Drugs domain:**

|                                                                                                               |
|---------------------------------------------------------------------------------------------------------------|
| 16. WHY IS IT IMPORTANT TO TAKE DRUGS FOR COPD?                                                               |
|                                                                                                               |
| a) Because they reduce breathlessness                                                                         |
| b) Because they slow your heartbeat                                                                           |
| c) Because they increase cough                                                                                |
|                                                                                                               |
| 17. MOST OF THE DRUGS FOR COPD ARE ADMINISTERED THROUGH THE USE OF DEVICES FOR INHALATION (SPRAY OR AEROSOL)? |
|                                                                                                               |
| a) Because they act directly on the lungs                                                                     |
| b) Because they act more slowly than tablets                                                                  |
| c) Because they increase cough                                                                                |
|                                                                                                               |
| 18. THE MEDICATIONS PRESCRIBED FOR COPD                                                                       |
|                                                                                                               |
| a) Should be used only when there is breathlessness                                                           |
| b) Should be used every day                                                                                   |

|                                          |
|------------------------------------------|
| c) Should be used only during the winter |
|------------------------------------------|

**e. Oxygen domain:**

|                                                                               |
|-------------------------------------------------------------------------------|
| 19. IN CASE OF NECESSITY FOR OXYGEN THERAPY AT HOME, WHAT IS NOT RECOMMENDED? |
|                                                                               |
| a) Washing the dishes or going to the toilet using oxygen                     |
| b) Take inhalation therapy during oxygen use                                  |
| c) Approach a smoking or open flame during oxygen use                         |
|                                                                               |
| 20. WHEN DO I USE THE OXYGEN?                                                 |
|                                                                               |
| a) Always                                                                     |
| b) Following the prescription of the pneumologist                             |
| c) Only when I have breathless                                                |

*Explanation:* each question has got only a right answer. We assigned 1 (correct) or 0 (wrong) point for each answer. The LQ total score might be between 0-20, where 0 refers to all wrong answers and 20 to all right ones.
